# Supplementary material
Source: Springer Nature journal article supplement (https://www.springermedizin.de/resource/supplementary/12875_2013_903_MOESM2_ESM.pdf/9435376)

## IDENTIFY/SCOPE THE PROBLEM

- Describe the problem and context under consideration
- Multi stakeholder involvement (may include practitioners – generalists and specialists – patients and carers, policy makers)

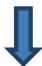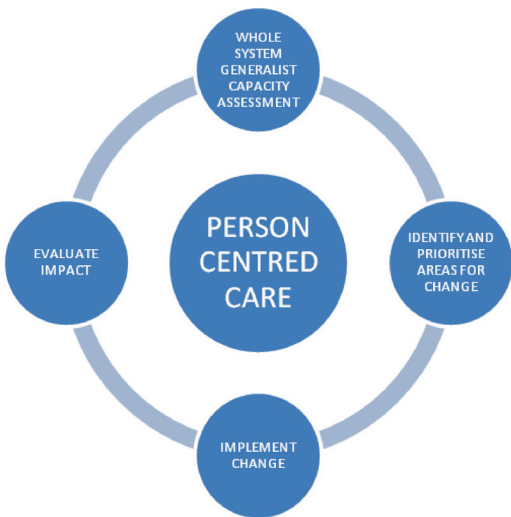

Supplement: MOESM2 [file 9435376]
